# Supplementary material
Source: PubMed Central journal article supplement (PMC3719633)
Supplement: JCM.00066-13_zjm999092676so1.pdf [file JCM.00066-13_zjm999092676so1.pdf]

The rMLST and whole genome NEIGHBORNET analyses described in this paper can be replicated with the following steps:

1. Navigate to the *Campylobacter* database on PubMLST.org (<http://pubmlst.org/campylobacter/>).
2. Select the isolate database:

The screenshot shows the 'Campylobacter MLST Home Page'. On the left is a 'Navigation' sidebar with links for PubMLST, Software, and Recently updated. The main content area is titled 'Campylobacter MLST Home Page' and contains a tree of databases. A red box highlights 'PubMLST Isolate Database' under the 'Campylobacter jejuni/coli' category. Below this are sections for 'Database submissions' and 'Website and database managed by Keith Jolley'. On the right, a 'Citing the database' section provides citation information for the 'jejunii/coli' and 'Non-jejunii/coli' databases.

To replicate Figure 2b: rMLST analysis of 89 ST-21 complex isolates. The isolates can be selected using a list query.

3. Click 'List query':

The screenshot shows the 'Welcome to the Campylobacter jejuni/coli PubMLST database' page. At the top, there are navigation links like 'Query: Search | Browse | Profile/ST | List'. Below the welcome message, there are three main sections: 'Query database', 'Option settings', and 'General information'. In the 'Query database' section, the 'List query' option is selected and highlighted with a red box. Below this, there are sections for 'Breakdown', 'Export', 'Analysis', and 'Miscellaneous'.

4. Select 'isolate' as the search attribute, paste the following list in to the form and click 'Submit':

|         |         |         |         |         |         |         |         |
|---------|---------|---------|---------|---------|---------|---------|---------|
| OXC6251 | OXC6300 | OXC6335 | OXC6420 | OXC6500 | OXC6538 | OXC6590 | OXC6627 |
| OXC6255 | OXC6301 | OXC6340 | OXC6429 | OXC6502 | OXC6539 | OXC6596 | OXC6629 |
| OXC6257 | OXC6303 | OXC6347 | OXC6449 | OXC6505 | OXC6543 | OXC6598 | OXC6633 |
| OXC6266 | OXC6305 | OXC6355 | OXC6457 | OXC6508 | OXC6548 | OXC6600 | OXC6636 |
| OXC6270 | OXC6310 | OXC6367 | OXC6459 | OXC6514 | OXC6552 | OXC6602 | OXC6637 |
| OXC6275 | OXC6317 | OXC6370 | OXC6461 | OXC6516 | OXC6558 | OXC6603 |         |
| OXC6277 | OXC6324 | OXC6379 | OXC6464 | OXC6519 | OXC6562 | OXC6604 |         |
| OXC6282 | OXC6325 | OXC6383 | OXC6479 | OXC6521 | OXC6563 | OXC6613 |         |
| OXC6285 | OXC6326 | OXC6384 | OXC6483 | OXC6524 | OXC6564 | OXC6615 |         |
| OXC6286 | OXC6329 | OXC6393 | OXC6489 | OXC6527 | OXC6565 | OXC6616 |         |
| OXC6289 | OXC6331 | OXC6394 | OXC6493 | OXC6530 | OXC6571 | OXC6619 |         |
| OXC6292 | OXC6334 | OXC6405 | OXC6496 | OXC6531 | OXC6573 | OXC6625 |         |

5. At the bottom of the page, click the 'Genome Comparator' button:

|       |         |    |      |            |                             |  |  |  |   |   |    |   |     |   |    |      |               |
|-------|---------|----|------|------------|-----------------------------|--|--|--|---|---|----|---|-----|---|----|------|---------------|
| 12883 | OXC5548 | UK | 2011 | 2011-09-26 | gastroenteritis human stool |  |  |  | 2 | 1 | 5  | 3 | 2   | 1 | 5  | 19   | ST-21 complex |
| 12887 | OXC5552 | UK | 2011 | 2011-09-26 | gastroenteritis human stool |  |  |  | 2 | 1 | 12 | 3 | 2   | 1 | 12 | 3769 | ST-21 complex |
| 12893 | OXC5558 | UK | 2011 | 2011-09-22 | gastroenteritis human stool |  |  |  | 2 | 1 | 21 | 3 | 2   | 1 | 5  | 53   | ST-21 complex |
| 12897 | OXC5562 | UK | 2011 | 2011-09-29 | gastroenteritis human stool |  |  |  | 2 | 1 | 1  | 3 | 2   | 1 | 5  | 21   | ST-21 complex |
| 12898 | OXC5583 | UK | 2011 | 2011-09-30 | gastroenteritis human stool |  |  |  | 2 | 1 | 1  | 3 | 2   | 1 | 5  | 21   | ST-21 complex |
| 12899 | OXC5584 | UK | 2011 | 2011-10-03 | gastroenteritis human stool |  |  |  | 2 | 1 | 1  | 3 | 2   | 1 | 5  | 21   | ST-21 complex |
| 12900 | OXC5585 | UK | 2011 | 2011-10-03 | gastroenteritis human stool |  |  |  | 2 | 1 | 12 | 3 | 2   | 1 | 5  | 50   | ST-21 complex |
| 12906 | OXC5571 | UK | 2011 | 2011-09-30 | gastroenteritis human stool |  |  |  | 2 | 1 | 12 | 3 | 2   | 1 | 5  | 50   | ST-21 complex |
| 12908 | OXC5573 | UK | 2011 | 2011-09-30 | gastroenteritis human stool |  |  |  | 2 | 1 | 1  | 3 | 2   | 1 | 5  | 21   | ST-21 complex |
| 16049 | OXC5251 | UK | 2011 | 2011-06-28 | gastroenteritis human stool |  |  |  | 2 | 1 | 1  | 3 | 2   | 1 | 5  | 21   | ST-21 complex |
| 16054 | OXC5257 | UK | 2011 | 2011-06-30 | gastroenteritis human stool |  |  |  | 2 | 1 | 1  | 3 | 2   | 1 | 5  | 21   | ST-21 complex |
| 16063 | OXC5286 | UK | 2011 | 2011-06-28 | gastroenteritis human stool |  |  |  | 2 | 1 | 12 | 3 | 2   | 1 | 5  | 50   | ST-21 complex |
| 16067 | OXC5270 | UK | 2011 | 2011-07-04 | gastroenteritis human stool |  |  |  | 2 | 1 | 1  | 3 | 2   | 1 | 5  | 21   | ST-21 complex |
| 16072 | OXC5275 | UK | 2011 | 2011-07-04 | gastroenteritis human stool |  |  |  | 2 | 1 | 1  | 3 | 2   | 1 | 5  | 21   | ST-21 complex |
| 16074 | OXC5277 | UK | 2011 | 2011-07-04 | gastroenteritis human stool |  |  |  | 2 | 1 | 12 | 3 | 2   | 1 | 5  | 50   | ST-21 complex |
| 16079 | OXC5282 | UK | 2011 | 2011-06-27 | gastroenteritis human stool |  |  |  | 2 | 1 | 21 | 3 | 2   | 1 | 5  | 53   | ST-21 complex |
| 16082 | OXC5285 | UK | 2011 | 2011-06-28 | gastroenteritis human stool |  |  |  | 2 | 1 | 1  | 3 | 2   | 1 | 5  | 21   | ST-21 complex |
| 16083 | OXC5286 | UK | 2011 | 2011-06-28 | gastroenteritis human stool |  |  |  | 2 | 1 | 12 | 3 | 2   | 1 | 5  | 50   | ST-21 complex |
| 16086 | OXC5289 | UK | 2011 | 2011-06-30 | gastroenteritis human stool |  |  |  | 2 | 1 | 12 | 3 | 2   | 1 | 5  | 50   | ST-21 complex |
| 16089 | OXC5292 | UK | 2011 | 2011-06-28 | gastroenteritis human stool |  |  |  | 2 | 1 | 12 | 3 | 2   | 1 | 5  | 50   | ST-21 complex |
| 16097 | OXC5300 | UK | 2011 | 2011-07-11 | gastroenteritis human stool |  |  |  | 8 | 1 | 5  | 3 | 2   | 1 | 12 | 2135 | ST-21 complex |
| 16098 | OXC6301 | UK | 2011 | 2011-07-12 | gastroenteritis human stool |  |  |  | 2 | 1 | 42 | 3 | 148 | 1 | 5  | 861  | ST-21 complex |
| 16100 | OXC6303 | UK | 2011 | 2011-07-11 | gastroenteritis human stool |  |  |  | 2 | 1 | 5  | 3 | 2   | 1 | 5  | 19   | ST-21 complex |
| 16102 | OXC6305 | UK | 2011 | 2011-07-11 | gastroenteritis human stool |  |  |  | 2 | 1 | 42 | 3 | 148 | 1 | 5  | 861  | ST-21 complex |
| 16107 | OXC6310 | UK | 2011 | 2011-07-13 | gastroenteritis human stool |  |  |  | 2 | 1 | 1  | 3 | 2   | 1 | 5  | 21   | ST-21 complex |

Analysis tools:

Breakdown: Fields Two Field Codons Polymorphic sites Combinations Schemes/alleles Publications Sequence bin Tag status

Analysis: BURST **Genome Comparator**

Export: Dataset Presence/Absence Concatenate XJMA

Page: 1 2 3 4 > Last

- Expand the 'Typing' heading in the 'Schemes' selection and select 'Ribosomal MLST', then click 'Submit':

PubMLST Query: Search | Browse | Profile/ST | List  
Breakdown: Isolate fields | Scheme/alleles | Publications  
Links: Contents | Home | Options | Profiles/sequences definitions | Database submissions

Genome Comparator Toggle Show options

Please select the required isolate ids and loci for comparison - use ctrl or shift to make multiple selections. In addition to selecting individual loci, you can choose to include all loci defined in schemes by selecting the appropriate scheme description. Alternatively, you can enter the accession number for an annotated reference genome and compare using the loci defined in that.

Isolates: 10935) OXC6544, 12883) OXC6545, 12881) OXC6546, 12882) OXC6547, 12883) OXC6548, 12884) OXC6549, 12885) OXC6550, 12886) OXC6551

Loci: aae (CAMP0964), aat (CAMP1030), accA (CAMP0408), accB (CAMP1209), accC (CAMP1209), accD (CAMP0115), ackA (CAMP0635), acnB (CAMP0770)

Schemes: All loci, Typing, MLST, Ribosomal MLST (highlighted), eMLST (21 partial genes), Other schemes, Loci not in schemes

Reference genome: Enter accession number: or choose annotated genome: or upload Genbank/EMBL file: Browse...

Parameters / options: Min % identity: 70, Min % alignment: 50, BLASTN word size: 15, Use TBLASTX, Produce alignments (Clustal + XMFA), Include ref sequences in alignment, Align all loci (not only variable), Use tagged designations if available, Disable HTML output

Restrict included sequences by: Sequence method: Project:

Reset Submit

- The analysis job will be submitted to the server job queue. Click the job hyperlink to display the job viewer page. This will auto-refresh until the analysis is completed:

PubMLST Query: Search | Browse | Profile/ST | List  
Breakdown: Isolate fields | Scheme/alleles | Publications  
Links: Contents | Home | Options | Profiles/sequences definitions | Database submissions

Genome Comparator Toggle Show options

This analysis has been submitted to the job queue.  
Please be aware that this job may take a long time depending on the number of comparisons and how busy the server is.  
[Follow the progress of this job and view the output.](#)

Listings of variable, missing, matching and truncated loci, unique strains, and a NEIGHBORNET will be generated and displayed at the bottom of the page. Various output files are hyperlinked including the distance matrix used to generate the network. This can be loaded in to stand-alone Splitstree for further manipulation.

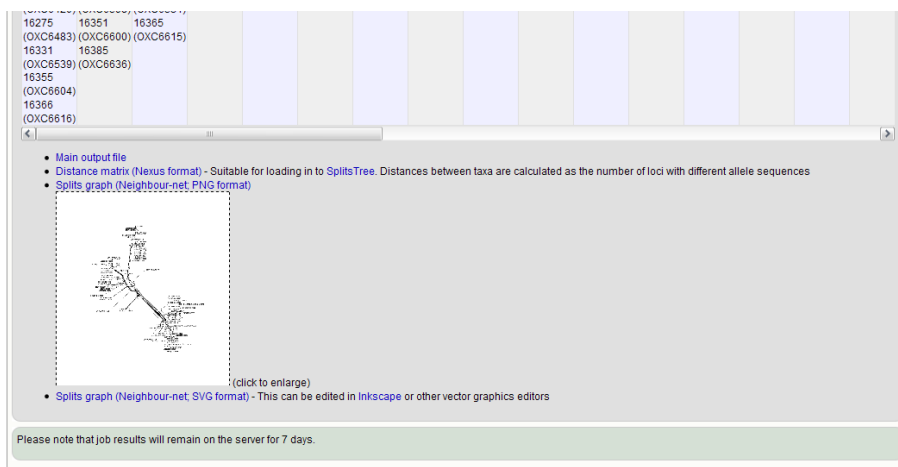

This is the NEIGHBORNET annotated in Figure 2b.

To replicate Figure 2c: 1643 locus analysis of ten isolates belonging to the ST-21 complex rMLST strain 3.

8. Return to the list query page as in step 3, select 'isolate' as the search attribute, paste the following list in to the form and click 'Submit':

OXC6266  
OXC6286  
OXC6292  
OXC6331  
OXC6347  
OXC6449  
OXC6457  
OXC6531  
OXC6571  
OXC6615

Query: Search | Browse | Profile/ST | List  
 Breakdown: Isolate fields | Scheme/alleles | Publications  
 Links: Contents | Home | Options | Profiles/sequences definitions | Database submissions

Toggle:  Field help:  Go

### Query *Campylobacter jejuni/coli* PubMLST database matching a field against a list

Please select attribute  
 isolate

Enter your list of attribute values below (one per line)

OXC6292  
 OXC6331  
 OXC6347  
 OXC6449  
 OXC6457  
 OXC6531  
 OXC6571  
 OXC6615

Display/sort options  
 Order by: id ascending  
 Display: 25 records per page

Reset Submit

9. At the bottom of the page, click the 'Genome Comparator' button:

OXC6449  
 OXC6457  
 OXC6531  
 OXC6571

Reset Submit

10 records returned. Click the hyperlinks for detailed information.

| Isolate fields |         |         |         |      |                |                 | MLST        |              |        |      |      |      |      |     |     |      |    |                |
|----------------|---------|---------|---------|------|----------------|-----------------|-------------|--------------|--------|------|------|------|------|-----|-----|------|----|----------------|
| id             | isolate | aliases | country | year | isolation date | disease         | source      | epidemiology | penner | aspA | pinA | gtaA | plyA | pmw | ctx | uncA | ST | clonal complex |
| 12906          | OXC6571 |         | UK      | 2011 | 2011-09-30     | gastroenteritis | human stool |              |        | 2    | 1    | 12   | 3    | 2   | 1   | 5    | 50 | ST-21 complex  |
| 16053          | OXC6266 |         | UK      | 2011 | 2011-06-28     | gastroenteritis | human stool |              |        | 2    | 1    | 12   | 3    | 2   | 1   | 5    | 50 | ST-21 complex  |
| 16083          | OXC6286 |         | UK      | 2011 | 2011-06-28     | gastroenteritis | human stool |              |        | 2    | 1    | 12   | 3    | 2   | 1   | 5    | 50 | ST-21 complex  |
| 16089          | OXC6292 |         | UK      | 2011 | 2011-06-28     | gastroenteritis | human stool |              |        | 2    | 1    | 12   | 3    | 2   | 1   | 5    | 50 | ST-21 complex  |
| 16128          | OXC6331 |         | UK      | 2011 | 2011-07-18     | gastroenteritis | human stool |              |        | 2    | 1    | 12   | 3    | 2   | 1   | 5    | 50 | ST-21 complex  |
| 16144          | OXC6347 |         | UK      | 2011 | 2011-07-28     | gastroenteritis | human stool |              |        | 2    | 1    | 12   | 3    | 2   | 1   | 5    | 50 | ST-21 complex  |
| 16242          | OXC6449 |         | UK      | 2011 | 2011-08-19     | gastroenteritis | human stool |              |        | 2    | 1    | 12   | 3    | 2   | 1   | 5    | 50 | ST-21 complex  |
| 16249          | OXC6457 |         | UK      | 2011 | 2011-08-22     | gastroenteritis | human stool |              |        | 2    | 1    | 12   | 3    | 2   | 1   | 5    | 50 | ST-21 complex  |
| 16323          | OXC6531 |         | UK      | 2011 | 2011-09-19     | gastroenteritis | human stool |              |        | 2    | 1    | 12   | 3    | 2   | 1   | 5    | 50 | ST-21 complex  |
| 16365          | OXC6615 |         | UK      | 2011 | 2011-10-16     | gastroenteritis | human stool |              |        | 2    | 1    | 12   | 3    | 2   | 1   | 5    | 50 | ST-21 complex  |

Analysis tools:

Breakdown: Fields Two Field Codons Polymorphic sites Combinations Scheme/alleles Publications Sequence bin Tag status

Analysis: BURST **Genome Comparator**

Export: Dataset Presence/Absence Concatenate XMFA

10. Expand the 'Other schemes' heading in the 'Schemes' selection and select '1643 Gundogdu loci'. Alignments of alleles from variable loci can be obtained for this and all other Genome Comparator datasets by checking the box next to 'Produce alignments (Clustal + XMFA)'. Click 'Submit':

Query: Search | Browse | Profile/ST | List  
 Breakdown: Isolate fields | Scheme/alleles | Publications  
 Links: Contents | Home | Options | Profiles/sequences definitions | Database submissions

Toggle:  Show options

### Genome Comparator

Please select the required isolate ids and loci for comparison - use ctrl or shift to make multiple selections. In addition to selecting individual loci, you can choose to include all loci defined in schemes by selecting the appropriate scheme description. Alternatively you can enter the accession number for an annotated reference genome and compare using the loci defined in that.

Isolates  
 12899 OXC6564  
 12900 OXC6565  
 12901 OXC6566  
 12902 OXC6567  
 12903 OXC6568  
 12904 OXC6569  
 12905 OXC6570  
 12906 OXC6571

Locs  
 aas (CAMP0864)  
 aat (CAMP1030)  
 aca (CAMP0400)  
 accb (CAMP1209)  
 accc (CAMP1208)  
 acd (CAMP0115)  
 adA (CAMP0635)  
 acb (CAMP0770)

Schemes  
 All loci  
 Typing  
 Other schemes  
 1643 Gundogdu loci  
 Loci not in schemes

Reference genome  
 Enter accession number:  
 or choose annotated genome:  
 or upload Genbank/EMBL file:

Parameters / options  
 Min % identity: 70  
 Min % alignment: 50  
 BLASTN word size: 15  
 Make tblASTN  
 Produce alignments (Clustal + XMFA)  
 Include ref sequences in alignment  
 Align all loci (not only variable)  
 Use tagged designations if available  
 Disable HTML output

Restrict included sequences by  
 Sequence method: Project

Reset Submit

11. The analysis job will be submitted to the server job queue. Click the job hyperlink to display the job viewer page. This will auto-refresh until the analysis is completed:

PubMLST Query: Search | Browse | Profile/ST | List  
Breakdown: Isolate fields | Schemalleles | Publications  
Links: Contents | Home | Options | Profiles/sequences definitions | Database submissions

Genome Comparator Toggle   
Show options

This analysis has been submitted to the job queue.  
Please be aware that this job may take a long time depending on the number of comparisons and how busy the server is.  
**Follow the progress of this job and view the output.**

Listings of variable, missing, matching and truncated loci, unique strains, and a NEIGHBORNET will be generated and displayed at the bottom of the page. Various output files including a hyperlink to the distance matrix used to generate the network and a hyperlink to the alignments will also be displayed.

|                    |       |       |       |       |       |       |       |       |       |       |
|--------------------|-------|-------|-------|-------|-------|-------|-------|-------|-------|-------|
| CAMP1250 (psdD)    | T     | T     | T     | T     | T     | 32    | 79    | T     | T     | T     |
| CAMP1252 (maf4)    | T     | T     | T     | T     | T     | 25    | new#1 | T     | T     | T     |
| CAMP1256 (Cj1340c) | X     | X     | X     | X     | X     | 38    | T     | X     | X     | 32    |
| CAMP1257 (maf9)    | X     | X     | X     | X     | X     | new#1 | T     | X     | X     | new#2 |
| CAMP1340 (Cj1429c) | 12    | 12    | 12    | 12    | T     | new#1 | X     | X     | X     | new#1 |
| CAMP1460 (Cj1564)  | X     | X     | X     | X     | X     | X     | X     | T     | T     | X     |
| CAMP1572 (Cj1677)  | new#1 | new#1 | new#1 | new#1 | new#1 | new#2 | new#3 | new#4 | T     | new#2 |
| CAMP1631 (ndpA)    | 4     | 3     | 4     | 2     | T     | new#1 | new#2 | new#3 | new#4 | new#5 |

Unique strains: 10

| Strain 1        | Strain 2        | Strain 3        | Strain 4        | Strain 5        | Strain 6        | Strain 7        | Strain 8        | Strain 9        | Strain 10       |
|-----------------|-----------------|-----------------|-----------------|-----------------|-----------------|-----------------|-----------------|-----------------|-----------------|
| 16242 (OXC6449) | 16128 (OXC6331) | 16365 (OXC6615) | 12906 (OXC6571) | 16323 (OXC6531) | 16063 (OXC6266) | 16144 (OXC6347) | 16249 (OXC6457) | 16083 (OXC6286) | 16089 (OXC6292) |

- Main output file
  - Distance matrix (Nexus format) - Suitable for loading in to SplitsTree. Distances between taxa are calculated as the number of loci with different allele sequences
  - Splits graph (Neighbour-net, PNG format)

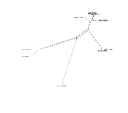

(click to enlarge)

- Splits graph (Neighbour-net, SVG format) - This can be edited in Inkscape or other vector graphics editors
- Alignments
- Alignment stats
- Extracted sequences (XMPA format)

This page will reload in 1 minute and 10 seconds. You can refresh it any time, or bookmark it and close your browser if you wish.  
Please note that job results will remain on the server for 7 days.

This is the NeighborNet annotated in Figure 2c.

To replicate Figure 2d: 1643 locus analysis of five closely-related strain 3 isolates.

12. Repeat the previous analysis using the following isolate list:

OXC6266

OXC6286

OXC6292

OXC6571

OXC6615

Use the '1643 Gundogdu loci' scheme in Genome Comparator as before.

The resulting NeighborNet is annotated in Figure 2d:

|                   |       |       |   |   |   |
|-------------------|-------|-------|---|---|---|
| CAMP1236 (maf1)   | T     | T     | T | T | T |
| CAMP1243 (Cj1325) | new#1 | new#1 | T | T | T |
| CAMP1250 (pseD)   | T     | T     | T | T | T |
| CAMP1252 (maf4)   | T     | T     | T | T | T |

**Unique strains**

Unique strains: 5

| Strain 1        | Strain 2        | Strain 3        | Strain 4        | Strain 5        |
|-----------------|-----------------|-----------------|-----------------|-----------------|
| 16385 (OXC6615) | 16089 (OXC6292) | 16083 (OXC6286) | 12906 (OXC6571) | 16063 (OXC6266) |

- [Main output file](#)
- [Distance matrix \(Nexus format\)](#) - Suitable for loading in to [SplitsTree](#). Distances between taxa are calculated as the number of loci with different allele sequences
- [Splits graph \(Neighbour-net PNG format\)](#)

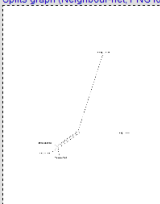

(click to enlarge)

- [Splits graph \(Neighbour-net SVG format\)](#) - This can be edited in [inkscape](#) or other vector graphics editors

Please note that job results will remain on the server for 7 days.

**Figure S1.** A ‘Click by Click Guide’ to NEIGHBOR-NET analysis using BIGSDB as implemented on pubMLST.org.

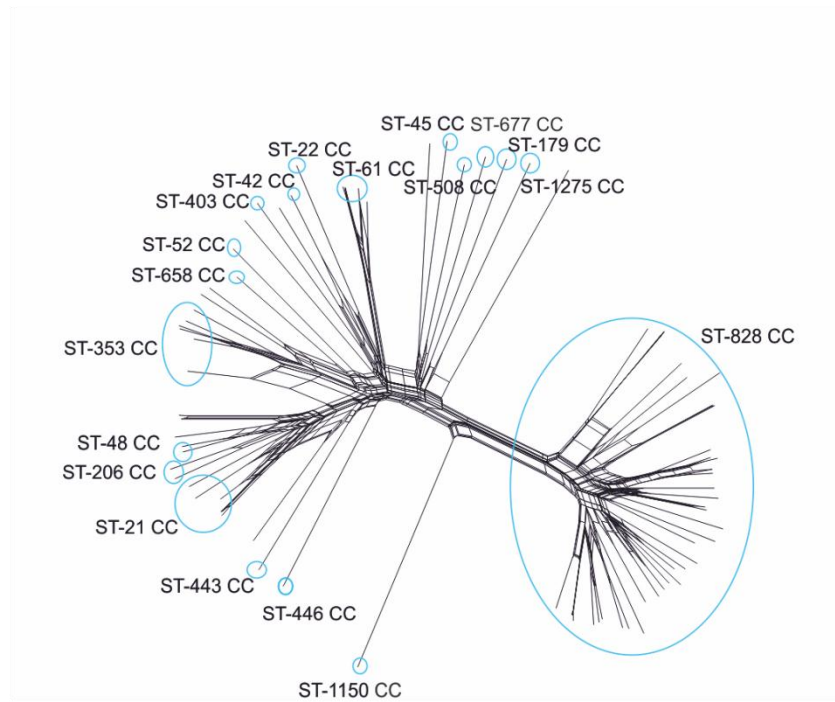

**Figure S2.** NEIGHBORNET phylogeny for rMLST alleles from 83 *Campylobacters* isolated from various host species from Europe, Canada and USA over more than a decade, labelled by clonal complex.



| <b>Locus</b>               | <b>No of new alleles<br/>identified in 379 isolates</b> | <b>No of isolates</b> |
|----------------------------|---------------------------------------------------------|-----------------------|
| BACT000001 ( <i>rpsA</i> ) | 48                                                      | 87                    |
| BACT000002 ( <i>rpsB</i> ) | 15                                                      | 43                    |
| BACT000003 ( <i>rpsC</i> ) | 13                                                      | 33                    |
| BACT000004 ( <i>rpsD</i> ) | 17                                                      | 34                    |
| BACT000005 ( <i>rpsE</i> ) | 14                                                      | 17                    |
| BACT000006 ( <i>rpsF</i> ) | 6                                                       | 11                    |
| BACT000007 ( <i>rpsG</i> ) | 13                                                      | 21                    |
| BACT000008 ( <i>rpsH</i> ) | 6                                                       | 8                     |
| BACT000009 ( <i>rpsI</i> ) | 8                                                       | 10                    |
| BACT000010 ( <i>rpsJ</i> ) | 4                                                       | 14                    |
| BACT000011 ( <i>rpsK</i> ) | 4                                                       | 4                     |
| BACT000012 ( <i>rpsL</i> ) | 11                                                      | 18                    |
| BACT000013 ( <i>rpsM</i> ) | 4                                                       | 6                     |
| BACT000014 ( <i>rpsN</i> ) | 4                                                       | 6                     |
| BACT000015 ( <i>rpsO</i> ) | 8                                                       | 24                    |
| BACT000016 ( <i>rpsP</i> ) | 4                                                       | 9                     |
| BACT000017 ( <i>rpsQ</i> ) | 2                                                       | 2                     |
| BACT000018 ( <i>rpsR</i> ) | 4                                                       | 6                     |
| BACT000019 ( <i>rpsS</i> ) | 4                                                       | 6                     |
| BACT000020 ( <i>rpsT</i> ) | 4                                                       | 8                     |
| BACT000021 ( <i>rpsU</i> ) | 4                                                       | 4                     |
| BACT000030 ( <i>rplA</i> ) | 15                                                      | 16                    |
| BACT000031 ( <i>rplB</i> ) | 26                                                      | 45                    |
| BACT000032 ( <i>rplC</i> ) | 19                                                      | 34                    |
| BACT000033 ( <i>rplD</i> ) | 17                                                      | 35                    |
| BACT000034 ( <i>rplE</i> ) | 11                                                      | 19                    |
| BACT000035 ( <i>rplF</i> ) | 13                                                      | 15                    |
| BACT000036 ( <i>rplL</i> ) | 12                                                      | 21                    |
| BACT000038 ( <i>rplI</i> ) | 19                                                      | 32                    |
| BACT000039 ( <i>rplJ</i> ) | 15                                                      | 22                    |
| BACT000040 ( <i>rplK</i> ) | 8                                                       | 21                    |
| BACT000042 ( <i>rplM</i> ) | 9                                                       | 44                    |
| BACT000043 ( <i>rplN</i> ) | 4                                                       | 45                    |
| BACT000044 ( <i>rplO</i> ) | 9                                                       | 17                    |
| BACT000045 ( <i>rplP</i> ) | 7                                                       | 11                    |
| BACT000046 ( <i>rplQ</i> ) | 6                                                       | 9                     |
| BACT000047 ( <i>rplR</i> ) | 15                                                      | 25                    |
| BACT000048 ( <i>rplS</i> ) | 3                                                       | 3                     |
| BACT000049 ( <i>rplT</i> ) | 15                                                      | 39                    |
| BACT000050 ( <i>rplU</i> ) | 8                                                       | 11                    |
| BACT000051 ( <i>rplV</i> ) | 8                                                       | 11                    |
| BACT000052 ( <i>rplW</i> ) | 7                                                       | 9                     |

|                   |     |    |
|-------------------|-----|----|
| BACT000053 (rplX) | 1   | 4  |
| BACT000056 (rpmA) | 11  | 15 |
| BACT000057 (rpmB) | 2   | 6  |
| BACT000058 (rpmC) | 1   | 1  |
| BACT000060 (rpmE) | 0   | 0  |
| BACT000061 (rpmF) | 3   | 7  |
| BACT000062 (rpmG) | 6   | 9  |
| BACT000063 (rpmH) | 3   | 3  |
| BACT000064 (rpmI) | 5   | 12 |
| BACT000065 (rpmJ) | 3   | 3  |
| TOTAL             | 478 |    |

**Table S1.** rMLST loci at which novel alleles were identified in a group of 376 *Campylobacter* isolates causing human disease.

| Locus                        | No of patients | Function                                             | Patient 1 | Patient 2 | Patient 3 | Patient 4 | Patient 5 | Patient 6      | Patient 7 | Patient 8 | Patient 9 | Patient 10 | Patient 11 | Patient 12 | Patient 13 | Patient 14 | Patient 15 | Patient 16 | Patient 17 |           |      |     |
|------------------------------|----------------|------------------------------------------------------|-----------|-----------|-----------|-----------|-----------|----------------|-----------|-----------|-----------|------------|------------|------------|------------|------------|------------|------------|------------|-----------|------|-----|
|                              |                |                                                      | 6266 6292 | 6269 6295 | 6271 6273 | 6298 6299 | 6320 6336 | 6328 6345 6377 | 6331 6347 | 6333 6388 | 6382 6462 | 6391 6392  | 6433 6435  | 6442 6443  | 6471 6472  | 6484 6485  | 6554 6555  | 6550       | 6566 6575  | 6542 6595 | 6610 |     |
| CAMP0044 (Cj0045c)           | 9              | putative iron binding protein                        | 18        | 70*       |           | 67        | 66*       | 65*            | 39        | 74*       | 64        | 75*        | 52         | 75*        | 7          | 76*        |            |            |            | 77*       | 77*  | 50  |
| CAMP1223 (Cj1305c)           | 9              | hypothetical protein                                 | 23        | 40        |           |           |           | 104            | 105*      |           |           |            |            |            |            |            |            |            |            |           |      |     |
| CAMP1224 (Cj1306c)           | 9              | hypothetical protein                                 | 63        | 54        |           |           |           | X              | X         |           |           | 17         | 56         | 66         | 54         | 1          |            |            |            |           |      |     |
| CAMP0631 (cipA)              | 5              | invasion protein CipA                                |           |           |           |           | 2*        | 3*             | 9*        | 8*        |           | 7*         | 4          |            |            |            |            |            |            |           |      |     |
| CAMP0575 (Cj0617)            | 4              | hypothetical protein                                 |           |           |           |           |           |                |           |           |           | 24         | 26*        |            |            | 18*        | 30         |            |            |           |      |     |
| CAMP1413 (Cj1506c)           | 4              | putative MCP-type signal transduction protein        | 97        | 1         |           |           |           |                |           |           |           |            |            | 79         | 25         |            |            | 23         | 77         |           |      |     |
| CAMP1228 (Cj1310c)           | 4              | hypothetical protein                                 | 62        | 64*       | 8         | 65*       |           | 47             | 66        | X         | X         |            |            |            |            |            |            |            |            |           |      |     |
| CAMP1213 (Cj1295)            | 3              | conserved hypothetical protein                       |           |           | 1         | 80*       |           |                |           |           |           | 1          | 1          | 80*        |            |            |            |            |            |           |      |     |
| CAMP1214 (Cj1296)            | 3              | hypothetical protein                                 |           |           |           |           |           |                |           |           |           |            |            |            |            |            |            |            |            | 11*       | 7    |     |
| <sup>2</sup> CAMP1236 (maf1) | 3              | motility accessory factor                            |           |           |           |           |           |                |           |           |           |            |            | 52         | 53         |            |            |            |            | 8         | 8    | 12* |
| <sup>2</sup> CAMP1250 (pseD) | 3              | pseD protein                                         |           |           |           |           |           |                |           |           |           |            |            | 84         | X          |            |            |            |            | 14        | 14   | 11  |
| <sup>2</sup> CAMP1252 (maf4) | 3              | motility accessory factor                            |           |           |           |           |           |                |           |           |           |            |            | 20         | 20         | 18         | 25         | 13         |            |           |      |     |
| <sup>2</sup> CAMP1253 (pseE) | 3              | pseE protein                                         |           |           |           |           |           |                |           |           |           |            |            | 53         | 52         |            |            |            |            | 14        | 14   | 11  |
| <sup>2</sup> CAMP1257 (maf6) | 3              | motility accessory factor                            |           |           |           |           |           |                |           |           |           |            |            | 58         | 128        | 119        | 120        |            |            | 45        | 42   | 42  |
| CAMP0254 (cheV)              | 2              | chemotaxis protein                                   | 1         | 80        |           |           |           |                |           |           |           |            |            | X          | X          |            |            |            |            | X         | X    | X   |
| CAMP0637 (Cj0691)            | 2              | hypothetical protein                                 |           |           |           |           |           | 54             | 42        |           |           |            |            |            |            |            |            |            |            |           |      |     |
| CAMP0751 (Cj0816)            | 2              | hypothetical protein                                 |           |           |           |           |           |                |           |           |           |            |            |            |            |            |            |            |            |           |      |     |
| CAMP0974 (cjel)              | 2              | restriction modification enzyme                      |           |           |           |           |           |                |           | 8         | 11*       | 11*        |            |            |            |            |            |            |            |           |      |     |
| CAMP1031 (Cj1110c)           | 2              | putative MCP-type signal transduction protein        |           | 41        | 81        |           |           |                |           | 41        | 78        | 41         |            |            |            |            |            |            |            |           |      |     |
| <sup>1</sup> CAMP1258 (maf7) | 2              | motility accessory factor                            |           |           |           |           |           |                |           |           |           |            |            | 52         | 100*       | 103*       | 82         |            |            |           |      |     |
| CAMP1331 (Cj1420c)           | 2              | putative methyltransferase                           |           |           |           |           |           |                |           |           |           |            |            | 15         | 65*        |            |            |            |            |           |      | 18  |
| CAMP1256 (Cj1340c)           | 2              | hypothetical protein                                 |           |           |           |           |           |                |           |           |           |            |            |            |            | 97         | 100        |            |            |           |      | 27  |
| CAMP0010 (rnhB)              | 1              | probable ribonuclease HII                            |           | 18        | 57        |           |           |                |           |           |           |            |            |            |            |            |            |            |            |           |      | 28  |
| CAMP0019 (Cj0019c)           | 1              | putative MCP-domain signal transduction protein      |           |           |           |           |           |                |           |           |           |            |            |            |            |            |            |            |            |           |      | 24  |
| CAMP0052 (fliM)              | 1              | flagellar motor switch protein FliM                  |           |           |           |           |           |                |           |           |           |            |            |            |            |            |            |            |            |           |      | 72  |
| CAMP0068 (cdtB)              | 1              | cytotolethal distending toxin B                      |           | 1         | 26        |           |           |                |           |           |           |            |            |            |            |            |            |            |            |           |      | 72  |
| CAMP0157 (Cj0170)            | 1              | hypothetical protein                                 |           |           |           |           |           |                |           |           |           |            |            |            |            |            |            |            |            |           |      | 71  |
| CAMP0167 (tonB1)             | 1              | putative TonB-dependent outer membrane receptor      |           |           |           |           |           |                |           |           |           |            |            |            |            |            |            |            |            |           |      |     |
| CAMP0202 (nrdF)              | 1              | mononucleotide-di-phosphate reductase subunit beta   |           | 30        | 84        |           |           |                |           |           |           |            |            |            |            |            |            |            |            |           |      |     |
| CAMP0208 (cynT)              | 1              | carbonic anhydrase                                   |           | 23        | 51        |           |           |                |           |           |           |            |            |            |            |            |            |            |            |           |      |     |
| CAMP0219 (Cj0249)            | 1              | hypothetical protein                                 |           |           |           |           |           |                |           |           |           |            |            |            |            |            |            |            |            |           |      |     |
| CAMP0252 (cheW)              | 1              | chemotaxis protein                                   |           |           |           |           |           |                |           |           |           |            |            |            |            |            |            |            |            |           |      |     |
| CAMP0253 (cheA)              | 1              | chemotaxis histidine kinase                          |           |           |           |           |           |                |           |           |           |            |            |            |            |            |            |            |            |           |      |     |
| CAMP0363 (gatC)              | 1              | gamma-glutamyl-tRNA amidotransferase subunit C       |           |           |           |           |           |                |           |           |           |            |            |            |            |            |            |            |            |           |      |     |
| CAMP0573 (pstA)              | 1              | putative phosphate transport system permease protein |           |           |           |           |           |                |           |           |           |            |            |            |            |            |            |            |            |           |      |     |
| CAMP0586 (Cj0628)            | 1              | putative lipoprotein                                 |           |           |           |           |           |                |           |           |           |            |            |            |            |            |            |            |            |           |      |     |
| CAMP0624 (kdpB)              | 1              | potassium-transporting ATPase subunit B              |           |           |           |           |           |                |           |           |           |            |            |            |            |            |            |            |            |           |      |     |
| CAMP0687 (Cj0741)            | 1              | hypothetical protein                                 |           |           |           |           |           |                |           |           |           |            |            |            |            |            |            |            |            |           |      |     |
| CAMP0714 (tpx)               | 1              | thiol peroxidase                                     |           |           |           |           |           |                |           |           |           |            |            |            |            |            |            |            |            |           |      |     |
| CAMP0749 (Cj0814)            | 1              | hypothetical protein                                 |           |           |           |           |           |                |           |           |           |            |            |            |            |            |            |            |            |           |      |     |
| CAMP0750 (Cj0815)            | 1              | hypothetical protein                                 |           |           |           |           |           |                |           |           |           |            |            |            |            |            |            |            |            |           |      |     |
| CAMP0803 (Cj0874c)           | 1              | putative cytochrome C                                |           |           |           |           |           |                |           |           |           |            |            |            |            |            |            |            |            |           |      |     |
| CAMP0822 (aroA)              | 1              | l-phenylalanine 1-carboxyvinyltransferase            |           |           |           |           |           |                |           |           |           |            |            |            |            |            |            |            |            |           |      |     |
| CAMP0849 (cheR)              | 1              | putative MCP protein methyltransferase               |           |           |           |           |           |                |           |           |           |            |            |            |            |            |            |            |            |           |      |     |
| CAMP0851 (rpiB)              | 1              | ribose 5-phosphate isomerase                         |           |           |           |           |           |                |           |           |           |            |            |            |            |            |            |            |            |           |      |     |
| CAMP0898 (Cj0975)            | 1              | putative outer-membrane protein                      |           | 24        | 27        |           |           |                |           |           |           |            |            |            |            |            |            |            |            |           |      |     |
| CAMP0899 (Cj0976)            | 1              | putative methyltransferase                           |           | 54        | 85        |           |           |                |           |           |           |            |            |            |            |            |            |            |            |           |      |     |
| CAMP0950 (gyrA)              | 1              | DNA gyrase subunit A                                 |           |           |           |           |           |                |           |           |           |            |            |            |            |            |            |            |            |           |      |     |
| CAMP1064 (neuA1)             | 1              | two-domain bifunctional protein                      |           |           |           |           |           |                |           |           |           |            |            |            |            |            |            |            |            |           |      |     |
| CAMP1097 (Cj1178c)           | 1              | highly acidic protein                                |           |           |           |           |           |                |           |           |           |            |            |            |            |            |            |            |            |           |      |     |
| CAMP1108 (cetB)              | 1              | bipartate energy taxis response protein cetB         |           |           |           |           |           |                |           |           |           |            |            |            |            |            |            |            |            |           |      |     |
| CAMP1109 (cetA)              | 1              | bipartate energy taxis response protein cetA         |           |           |           |           |           |                |           |           |           |            |            |            |            |            |            |            |            |           |      |     |
| CAMP1123 (atpB)              | 1              | FOF1 ATP synthase subunit A                          |           | 23        | 67        |           |           |                |           |           |           |            |            |            |            |            |            |            |            |           |      |     |
| CAMP1124 (radA)              | 1              | DNA repair protein radA                              |           |           |           |           |           |                |           |           |           |            |            |            |            |            |            |            |            |           |      |     |
| CAMP1143 (Cj1224)            | 1              | putative iron-binding protein                        |           |           |           |           |           |                |           |           |           |            |            |            |            |            |            |            |            |           |      |     |
| CAMP1165 (uvrC)              | 1              | excinuclease ABC subunit C                           |           |           |           |           |           |                |           |           |           |            |            |            |            |            |            |            |            |           |      |     |
| CAMP1181 (racS)              | 1              | two-component sensor (histidine kinase)              |           |           |           |           |           |                |           |           |           |            |            |            |            |            |            |            |            |           |      |     |
| CAMP1243 (Cj1325)            | 1              | putative methyltransferase                           |           |           |           |           |           |                |           |           |           |            |            |            |            |            |            |            |            |           |      |     |
| CAMP1255 (flaA)              | 1              | flagellin                                            |           |           |           |           |           |                |           |           |           |            |            |            |            |            |            |            |            |           |      |     |
| CAMP1283 (Cj1367c)           | 1              | putative nucleotidyltransferase                      |           | 20        | 136       |           |           |                |           |           |           |            |            |            |            |            |            |            |            |           |      |     |
| CAMP1396 (ccoQ)              | 1              | cb-type cytochrome C oxidase subunit IV              |           | 13        | 1         |           |           |                |           |           |           |            |            |            |            |            |            |            |            |           |      |     |
| CAMP1422 (Cj1516)            | 1              | putative periplasmic oxidoreductase                  |           |           |           |           |           |                |           |           |           |            |            |            |            |            |            |            |            |           |      |     |
| CAMP1442 (Cj1542)            | 1              | putative allophanate hydrolase subunit 1             |           |           |           |           |           |                |           |           |           |            |            |            |            |            |            |            |            |           |      |     |
| CAMP1510 (chuA)*             | 1              | haem uptake system outer membrane receptor           |           |           |           |           |           |                |           |           |           |            |            |            |            |            |            |            |            |           |      |     |
| CAMP1527 (Cj1631c)           | 1              | conserved hypothetical protein                       |           |           |           |           |           |                |           |           |           |            |            |            |            |            |            |            |            |           |      |     |
| CAMP1572 (Cj1677)            | 1              | putative lipoprotein                                 |           |           |           |           |           |                |           |           |           |            |            |            |            |            |            |            |            |           |      |     |
| CAMP1581 (secY)              | 1              | preprotein translocase subunit SecY                  |           |           |           |           |           |                |           |           |           |            |            |            |            |            |            |            |            |           |      |     |
| CAMP1631 (kdpA)*             | 1              | dogene (potassium-transporting ATPase A sub          | 3*        | 2*        |           |           |           |                |           |           |           |            |            |            |            |            |            |            |            |           |      |     |

\* involves change in homopolymeric tract length of assigned allele as compared to consensus for this ORF in strain 11166

X allele unassigned due to paralogous sequence

<sup>1</sup> Member of 617 family of variable genes (24).

<sup>2</sup> Member of 1318 family of variable genes (24).

**Table S2.** Allele numbers at loci where polymorphisms were identified between samples of the same sequence type, obtained from the same patient.

|    | <b>Isolates</b> | <b>No of matching loci</b> | <b>No of variable loci</b> | <b>Percent matching</b> |
|----|-----------------|----------------------------|----------------------------|-------------------------|
| 13 | 6471 / 6471R    | 1478                       | 1                          | 99.93                   |
| 13 | 6472 / 6472R    | 1478                       | 1                          | 99.93                   |
| 14 | 6484 / 6484R    | 1552                       | 2                          | 99.87                   |
| 14 | 6485 / 6485R    | 1557                       | 1                          | 99.94                   |
| 16 | 6566 / 6566R    | 1583                       | 2                          | 99.87                   |
| 16 | 6575 / 6575R    | 1586                       | 7                          | 99.56                   |
| 17 | 6595 / 6595R    | 1533                       | 3                          | 99.80                   |
| 17 | 6610 / 6610R    | 1530                       | 1                          | 99.93                   |
| NA | 6576 / 6576R    | 1455                       | 6                          | 99.59                   |
| NA | 6578 / 6578R    | 1584                       | 2                          | 99.87                   |

**Table S3.** Variation detected between repeated samples.
